# Supplementary material for: Multifunctional theranostic nanosystems enabling photothermal-chemo combination therapy of triple-stimuli-responsive drug release with magnetic resonance imaging
Source: Royal Society of Chemistry journal article supplement (doi:10.1039/c9bm01482a), 2019-11-21
Supplement: c9bm01482a1.pdf [file c9bm01482a1.pdf]

## Supporting Information

### Multifunctional theranostic nanosystems enabling photothermal-chemo combination

#### therapy of triple-stimuli-responsive drug release with magnetic resonance imaging

Xiao Lin<sup>a</sup>, Xiaofang Song<sup>a</sup>, Yiwei Zhang<sup>a</sup>, Yanbing Cao<sup>a</sup>, Yanan Xue<sup>a</sup>, Fengshou Wu<sup>a</sup>, Faquan Yu<sup>a\*</sup>, Ming Wu<sup>b\*</sup> and Xunjin Zhu<sup>c\*</sup>

<sup>a</sup>Key Laboratory for Green Chemical Process of Ministry of Education, Hubei Key Laboratory for Novel Reactor and Green Chemistry Technology, Hubei Engineering Research Center for Advanced Fine Chemicals, School of Chemical Engineering and Pharmacy, Wuhan Institute of Technology, Wuhan 430205, P.R. China

<sup>b</sup>The United Innovation of Mengchao Hepatobiliary Technology Key Laboratory of Fujian Province, Mengchao Hepatobiliary Hospital of Fujian Medical University, Fuzhou 350025, P. R. China

<sup>c</sup>Department of Chemistry and State Key Laboratory of Environmental and Biological Analysis, Hong Kong Baptist University, Kowloon Tong, Hong Kong, P.R. China.

Corresponding Author

\*E-mail: fyu@wit.edu.cn, fyuwucn@gmail.com (F.Y).

\*E-mail: wmmj0419@163.com (M.W).

\*E-mail: xjzhu@hkbu.edu.hk (X.Z).

### Experimental Section

To evaluate the photothermal conversion efficiency, the temperature change of the FPCH NPs aqueous dispersion (100 µg mL<sup>-1</sup>) was recorded as a function of time under continuous irradiation from the 808 nm laser with a power density of 2 W cm<sup>-2</sup> until the solution reached a steady-state temperature. The photothermal conversion efficiency ( $\eta$ ) was calculated using **Equation 1** as described by in a previous report:

$$\eta = \frac{hA\Delta T_{max} - Q_s}{I(1 - 10^{-A\lambda})} \quad (1)$$

Herein,  $\Delta T_{max} = T_{max} - T_{Surr}$ ,  $T_{max}$  is the equilibrium temperature,  $T_{Surr}$  is the ambient temperature of the surroundings,  $I$  is the incident laser power,  $A\lambda$  is the absorbance of the

FPCH NPs at 808 nm,  $Q_s$  is the heat associated with the light absorbance of the solvent,  $h$  is the heat transfer coefficient and  $A$  is the surface area of the container.  $hA$  can be calculated as followed **Equation 2**:

$$\tau_s = \frac{m_D C_D}{hA} \quad (2)$$

where  $\tau_s$  is the sample system time constant,  $m_D$  is the mass of solvent, and  $C_D$  is the heat capacity of the solvent.  $\tau_s$  is the sample system time constant.

In order to obtain the  $\tau_s$ , herein  $\vartheta$  was introduced (**Equation 3**), which was defined as the ratio of  $\Delta T$  to  $\Delta T_{max}$ .

$$\theta = \frac{\Delta T}{\Delta T_{max}} \quad (3)$$

$\tau_s$  can be determined by applying the linear time data from the cooling period versus  $-\ln\vartheta$ . (Figure S3,S4) Substituting  $hA$  value into **Equation 1**, the  $\eta$  of FPCH NPs be calculated to be 36.2 %.

### Supplementary Figures

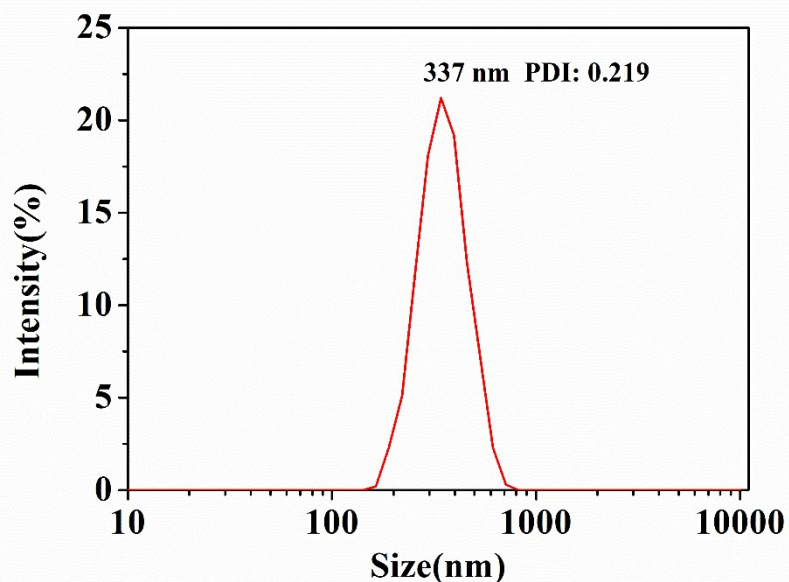

**Figure S1** Size distribution curves (determined from DLS) of FPCH-DOX NPs.

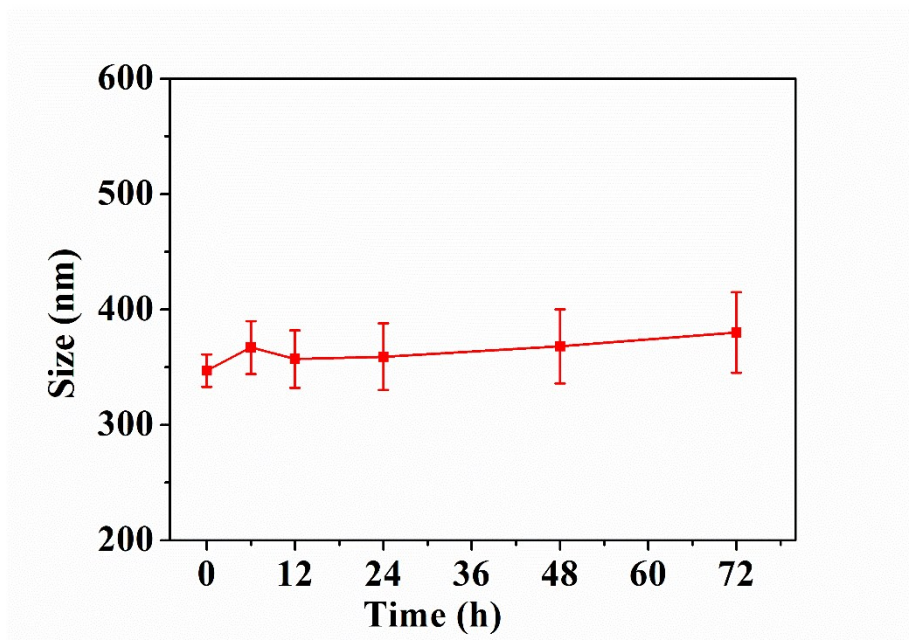

Figure S2 DLS measured size changes of FPCH-DOX NPs incubated in PBS.

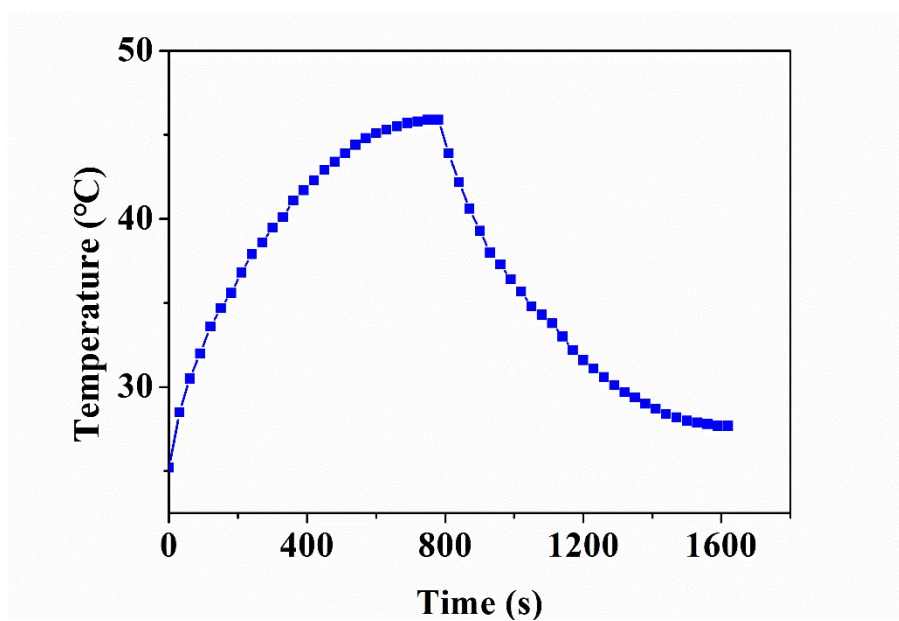

Figure S3 Photothermal effect of FPCH NPs under 808 nm laser irradiation ( $2 \text{ W cm}^{-2}$ ) until reaching a steady temperature and then the laser was shut off.

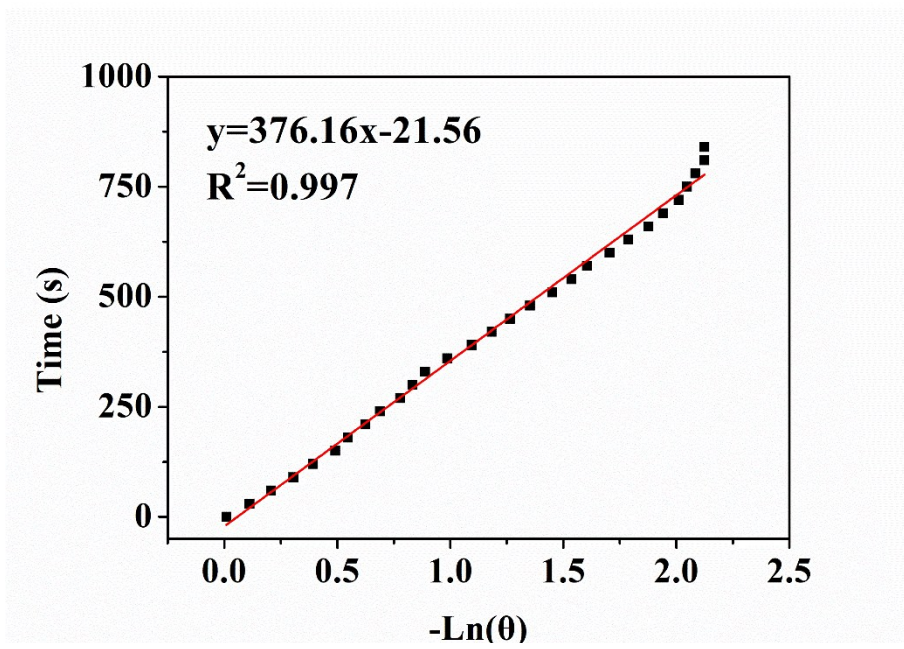

**Figure S4** Linear time data from the cooling period versus negative natural logarithm of driving force temperature.
